# Supplementary material for: Site-specific phosphorylation and caspase cleavage of GFAP are new markers of Alexander disease severity
Source: eLife. 2019 Nov 4;8:e47789. doi: 10.7554/eLife.47789 (PMC6927689; doi:10.7554/eLife.47789)
Supplement: Figure 2—source data 1. [file elife-47789-fig2-data1.xlsx]

## Sheet: Phospho
Figure 1-Source Data 1. LC-MS/MS analysis of purified GFAP across AxD patients (F1-F13) and non-AxD controls (F14-F16). Phosphorylation was only detected in the AxD patient samples.
The #PSMs is the sum of peptide spectral matches across all samples. The peak areas correspond to the individual samples and is a measure of relative abundance for a given phosphopeptide across samples.
					AxD patients													non-AxD Controls
				Mutation	D395Y	R239H	E373K	R239H	R239C	R239C	R79C	K63E	R79C	E210K	D417A	S247P	N77S	Control	Control	Control
				Age	244 days	347 days	192 days	1year	2.5 years	6.2 years	14 years	27.4 years	28.7 years	33.7 years	42.6 years	50.4 years	2 years	2.8 years	1.7 years	27.9 years
				ID	1482	1070	885	5488	1161	338	613	5377	5517	M3596	5109	4858	2768	1791	1547	1711
Positions in GFAP	Annotated Peptide Sequence	Modifications in GFAP	Phosphorylation site in GFAP	# PSMs	Area: F1	Area: F2	Area: F3	Area: F4	Area: F5	Area: F6	Area: F7	Area: F8	Area: F9	Area: F10	Area: F11	Area: F12	Area: F13	Area: F14	Area: F15	Area: F16	# Missed Cleavages	Theo. MH+ [Da]	Charge Sequest HT	m/z [Da] Sequest HT	DeltaM [ppm] Sequest HT	RT [min] Sequest HT	XCorr Sequest HT	Percolator q-Value
P14136 [12-29]	[R].RSYVSSGEMMVGGLAPGR.[R]	1xOxidation [M20(100)]; 1xPhospho [S13(100)]	S13	28	95577154	5.87167e+07	4.28128e+07	7.81233e+07	8.19055e+07					1.87456e+07			4.9832e+07				1	1949.86	3	650.626	0.98	23.7419	3.85	0
P14136 [13-29]	[R].SYVSSGEMMVGGLAPGR.[R]	1xOxidation [M20(99.5)]; 1xPhospho [S13(100)]	S13	22	2.71325e+07	2.18446e+07	8.58687e+06	3.11085e+07	2.69515e+07		8.75152e+06										0	1793.76	2	897.385	1.91	31.2339	1.99	0
P14136 [12-29]	[R].RSYVSSGEMMVGGLAPGR.[R]	1xPhospho [S13(100)]	S13	28	2.30779e+08	1.22839e+08	5.74112e+07	2.53747e+08	2.47813e+08					1.3789e+08			1.83793e+08				1	1933.87	3	645.294	0.67	27.5307	2.99	0
P14136 [13-29]	[R].SYVSSGEMMVGGLAPGR.[R]	1xPhospho [S13(100)]	S13	32	8.29262e+07	5.15777e+07	1.74147e+07	8.69931e+07	7.6464e+07	1.02098e+07	2.34421e+07			4.96353e+07			6.09527e+07				0	1777.76	2	889.386	0.44	33.5876	1.57	0
P14136 [12-29]	[R].RSYVSSGEMMVGGLAPGR.[R]	2xOxidation [M20(100); M21(100)]; 1xPhospho [S13(100)]	S13	18	5.35522e+08	3.15113e+08	152670041	3.82725e+08	3.92493e+08	8.76803e+07	1.31603e+08			1.11774e+08			1.95102e+08				1	1965.86	3	655.957	0.64	20.3094	4.11	0
P14136 [13-29]	[R].SYVSSGEMMVGGLAPGR.[R]	2xOxidation [M20(100); M21(100)]; 1xPhospho [S13(100)]	S13	24	1.67923e+08	1.14455e+08	5.51143e+07	1.19387e+08	1.15651e+08	3.34415e+07	60805690			4.08476e+07			67059272				0	1809.75	2	905.381	0.12	25.5298	2.72	0
P14136 [80-86]	[R].FASYIEK.[V]	1xPhospho [S82(100)]	S82	9	6.24773e+08	8.53917e+08		5.87782e+08	1.60541e+07	2.17327e+08	4.63014e+07						1.26261e+08				0	937.407	2	469.206	-2.16	17.7841	1.47	0.003938
P14136 [142-152]	[R].DNLAQDLATVR.[Q]	1xPhospho [T150(100)]	T150	1		2.04747e+07															0	1295.6	2	648.304	1.45	28.6387	3.29	0.003005
P14136 [174-183]	[R].QEADEATLAR.[L]	1xPhospho [T180(100)]	T180	6	3.08253e+07	6.95291e+07	5.52758e+07	7.81555e+07	1.34367e+07								1.01403e+07				0	1183.5	2	592.254	1.24	14.1404	3.11	0.004517
P14136 [189-198]	[R].KIESLEEEIR.[F]	1xPhospho [S192(100)]	S192	5	11163539	1.57044e+07		1.76799e+07	1.44513e+07	4.06056e+07											1	1325.63	2	663.321	0.44	23.4204	2.59	0.0007231
P14136 [288-308]	[R].QLQSLTCDLESLRGTNESLER.[Q]	1xCarbamidomethyl [C294]; 1xPhospho [S298(100)]	S298	13	6.22497e+08	4.69784e+08		5.9226e+08	3.06948e+08	3.30892e+08	2.24733e+08			7.40173e+07			1.31832e+08				1	2529.17	4	633.047	1.01	30.2581	4.66	0.0008791
P14136 [288-300]	[R].QLQSLTCDLESLR.[G]	1xCarbamidomethyl [C294]; 1xPhospho [S298(100)]	S298	15	7.94119e+07	8.55957e+07		5.21863e+07	2.70703e+07	43466017	2.45742e+07			4039567			8.56488e+06				0	1642.75	3	548.255	0.8	32.9682	3.15	0.0008791
P14136 [301-308]	[RK].GTNESLER.[Q]	1xPhospho [S305(100)]	S305	6				622398073		4.4294e+08	2.91404e+08	3.9217e+07		167077230			2.31731e+08				0	985.399	2	493.203	0.29	10.3943	2.03	0.02352
P14136 [320-330]	[R].EAASYQEALAR.[L]	1xPhospho [S323(100)]	S323	3			2.38747e+07		5.55059e+07												0	1288.56	2	644.781	-1.6	20.5717	2.42	0.0003921
P14136 [331-344]	[R].LEEEGQSLKDEMAR.[H]	1xOxidation [M342(100)]; 1xPhospho [S337(100)]	S337	14	1.10695e+08	7.65398e+07	4.59549e+07	96945675	6.87266e+07	150203516	4.71268e+07										1	1730.73	2	865.869	0.63	13.8189	1.61	0.009791
P14136 [331-344]	[R].LEEEGQSLKDEMAR.[H]	1xPhospho [S337(100)]	S337	11	2.61001e+07	6.83943e+07	1.55236e+07	7.97804e+07	8.3036e+07	4.84966e+07	2.35265e+07						3.92417e+07				1	1714.74	2	857.873	1.52	18.7714	2.63	0.0003921
P14136 [377-390]	[R].ITIPVQTFSNLQIR.[E]	1xPhospho [S385(100)]	S385	14	6.2603e+06	8.20696e+06		1.14898e+07	4.41879e+06	1.57972e+07	6.91313e+06						6.59448e+06				0	1709.9	3	570.638	0.5	38.9145	1.69	0.00164
P14136 [391-405]	[R].ETSLDTKSVSEGHLK.[R]	1xPhospho [S398(100)]	S398	7	4.72429e+07	1.11237e+08	53738241	1.02003e+08	3.39744e+07		4.23177e+07			2.58643e+07							1	1710.79	3	570.936	-0.39	14.3236	2.5	0.007878
P14136 [398-406]	[K].SVSEGHLKR.[N]	1xPhospho [S398(99.8)]	S398	19	1.53617e+08	1.87021e+08	9.80288e+07	1.96653e+08	8.49164e+07	1.08713e+08	58156474	1.05359e+07		4.63619e+07			4.59661e+07				1	1092.52	3	364.845	-0.36	7.0585	2.3	0.0009906
P14136 [398-405]	[K].SVSEGHLK.[R]	1xPhospho [S400(100)]	S400	8	6.43771e+08	5.51144e+08		5.90853e+08	307271323	280638528	2.38927e+08			124310486			193302364				0	936.419	2	468.713	0.31	7.7864	2.06	0.005597
