# Supplementary material for: Site-specific phosphorylation and caspase cleavage of GFAP are new markers of Alexander disease severity
Source: eLife. 2019 Nov 4;8:e47789. doi: 10.7554/eLife.47789 (PMC6927689; doi:10.7554/eLife.47789)
Supplement: Figure 7—source data 1. [file elife-47789-fig7-data1.xlsx]

## Sheet: Proteins&Peptide
Accession	Description	Score	Coverage	# Proteins	# Unique Peptides	# Peptides	# PSMs	# AAs	MW [kDa]	calc. pI
P14136-3	Isoform 3 of Glial fibrillary acidic protein OS=Homo sapiens GN=GFAP - [GFAP_HUMAN]	313.49	59.86	21	23	24	123	431	49.4776	6.12549
	A2	Sequence	# PSMs	# Proteins	# Protein Groups	Protein Group Accessions	Modifications	ΔCn	phosphoRS Site Probabilities	q-Value	PEP	XCorr	Charge	MH+ [Da]	ΔM [ppm]	RT [min]	# Missed Cleavages
	High	HLQEYQDLLNVK	8	4	1	P14136-3		0		0	0.0001915	4.54983	2	1499.79	-0.153036	50.7537	0
	High	QQVHVELDVAKPDLTAALK	7	5	1	P14136-3		0		0	2.542e-05	3.69652	3	2075.15	1.23533	53.47	0
	High	LEAENNLAAYR	5	6	1	P14136-3		0		0	0.00841	3.4799	2	1263.64	1.75372	37.1858	0
	High	TQYEAmASSNMHEAEEWYR	2	5	1	P14136-3	M6(Oxidation)	0		0	0.004098	3.45591	3	2348.96	0.69721	45.7938	0
	High	LDQLTANSAR	3	7	1	P14136-3		0		0	0.009908	3.39872	2	1088.57	1.67684	28.0197	0
	High	LEEEGQSLKDEMAR	6	4	1	P14136-3		0		0	0.0008702	3.35217	3	1634.77	0.645017	35.4335	1
	High	LEAEnNLAAYR	6	6	1	P14136-3	N5(Deamidated)	0		0	0.002996	3.27109	2	1264.62	-1.14917	39.473	0
	High	KIESLEEEIR	6	4	1	P14136-3		0		0	0.01931	3.24656	2	1245.67	0.436457	42.2455	1
	High	LDQLTAnSAR	3	7	1	P14136-3	N7(Deamidated)	0		0	0.005253	3.21932	2	1089.56	2.34093	28.1737	0
	High	ITIPVQTFSNLQIR	3	3	1	P14136-3		0		0	0.0002523	3.16187	2	1629.93	1.32799	58.3188	0
	High	LADVYQAELR	6	7	1	P14136-3		0		0	0.003683	3.0951	2	1177.62	1.70279	42.4826	0
	High	LADVYqAELR	1	7	1	P14136-3	Q6(Deamidated)	0		0	0.01056	3.07352	2	1178.6	-0.479757	43.5471	0
	High	TQYEAmASSNmHEAEEWYR	5	5	1	P14136-3	M6(Oxidation); M11(Oxidation)	0		0	0.005824	3.03682	3	2364.95	0.803796	40.1397	0
	High	ALAAELNQLR	7	7	1	P14136-3		0		0	0.01044	2.91772	2	1098.63	1.6605	43.6515	0
	High	DNLAQDLATVR	6	7	1	P14136-3		0		0	0.02044	2.88801	2	1215.63	1.51349	51.4216	0
	High	DNLAqDLATVR	1	7	1	P14136-3	Q5(Deamidated)	0		0	0.02558	2.81805	2	1216.61	-2.00542	52.0784	0
	High	QEADEATLAR	2	4	1	P14136-3		0		0	0.02531	2.79242	2	1103.53	1.62405	26.1422	0
	High	QLQSLTcDLESLR	1	5	1	P14136-3	C7(Carbamidomethyl)	0		0	0.0003379	2.71967	2	1562.79	0.939924	56.7846	0
	High	SYVSSGEMMVGGLAPGR	1	8	1	P14136-3		0		0	0.003985	2.66805	2	1697.8	1.13877	52.5073	0
	High	FADLTDAAAR	2	6	1	P14136-3		0		0	0.002569	2.60321	2	1050.52	0.600678	38.7291	0
	High	IESLEEEIR	1	4	1	P14136-3		0		0	0.01719	2.59709	2	1117.57	1.03199	42.002	0
	High	EAASYqEALAR	1	4	1	P14136-3	Q6(Deamidated)	0		0	0.01416	2.55754	2	1209.57	-2.64438	36.1757	0
	High	SYVSSGEmmVGGLAPGR	4	8	1	P14136-3	M8(Oxidation); M9(Oxidation)	0		0	0.001434	2.554	3	1729.79	2.15526	41.0078	0
	High	VDFSLAGALNAGFK	3	7	1	P14136-3		0		0	0.005977	2.50288	2	1409.74	1.25336	61.8533	0
	High	LALDIEIATYR	3	14	2	P14136-3;K2C1_HUMAN		0		0	0.005324	2.42242	2	1277.71	1.70187	61.468	0
	High	ALAAELnQLR	8	7	1	P14136-3	N7(Deamidated)	0		0	0.01329	2.40991	2	1099.61	0.98638	40.6379	0
	High	EAASYQEALAR	4	4	1	P14136-3		0		0	0.02209	2.26293	2	1208.59	0.894515	33.7103	0
	High	SYVsSGEmmVGGLAPGR	4	8	1	P14136-3	S4(Phospho); M8(Oxidation); M9(Oxidation)	0.0088	S(1): 2.3; Y(2): 2.3; S(4): 47.7; S(5): 47.7	0	0.003087	2.25278	2	1809.76	0.807227	45.9413	0
	High	SYVSSGEMmVGGLAPGR	1	8	1	P14136-3	M9(Oxidation)	0		0	7.718e-05	2.23518	2	1713.79	0.248928	45.7286	0
	High	VDFSLAGALnAGFK	1	7	1	P14136-3	N10(Deamidated)	0		0	0.0005747	2.20633	2	1410.73	0.209019	59.326	0
	High	LEEEGQSLKDEmAR	1	4	1	P14136-3	M12(Oxidation)	0		0	0.001489	2.1023	2	1650.77	1.06518	26.834	1
	High	LqDETNLR	1	6	1	P14136-3	Q2(Deamidated)	0		0.004	0.04374	2.54777	2	989.491	0.984335	27.1991	0
	High	LQDETNLR	2	6	1	P14136-3		0		0.004	0.08023	2.32499	2	988.506	0.251672	26.5153	0
	High	TQYEAmASSnmHEAEEWYR	1	5	1	P14136-3	M6(Oxidation); N10(Deamidated); M11(Oxidation)	0		0.004	0.04974	2.32284	3	2365.95	5.13437	43.1678	0
	High	HEANDYR	1	6	1	P14136-3		0		0.004	0.07993	2.10835	2	904.391	0.611113	14.7403	0
	Medium	GTnESLER	1	7	1	P14136-3	N3(Deamidated)	0		0.017	0.1005	2.00076	2	906.418	1.763	20.9272	0
	Medium	KLLEGEENR	3	4	1	P14136-3		0		0.02	0.1245	2.52197	2	1087.58	1.2301	24.847	1
	Medium	GTNESLER	1	7	1	P14136-3		0		0.043	0.2163	2.06975	2	905.433	1.09878	20.5241	0
	Medium	LLEGEENR	1	4	1	P14136-3		0		0.049	0.2299	2.05266	2	959.48	0.693847	25.2234	0
TRYP_PIG	COMMON CONTAMINANT!	95.7796	29.44	1	6	6	34	231	24.3938	7.18115
	A2	Sequence	# PSMs	# Proteins	# Protein Groups	Protein Group Accessions	Modifications	ΔCn	phosphoRS Site Probabilities	q-Value	PEP	XCorr	Charge	MH+ [Da]	ΔM [ppm]	RT [min]	# Missed Cleavages
	High	LGEHNIDVLEGNEQFINAAK	6	1	1	TRYP_PIG		0		0	1.40624e-05	4.85302	3	2211.11	1.74756	53.2667	0
	High	LGEHNIDVLEGNEQFINAAk	4	1	1	TRYP_PIG	K20(Methyl)	0		0	0.002846	4.80436	3	2225.12	1.56074	52.8947	0
	High	IITHPNFNGNTLDNDImLIkLSSPATLNSR	2	1	1	TRYP_PIG	M17(Oxidation); K20(Methyl)	0		0	0.002783	4.79154	3	3339.75	2.98853	60.1312	1
	High	IITHPNFNGNTLDNDIMLIK	1	1	1	TRYP_PIG		0		0	0.0001672	3.91365	3	2283.18	0.663788	57.9673	0
	High	IITHPNFNGnTLDNDIMLIk	2	1	1	TRYP_PIG	N10(Deamidated); K20(Methyl)	0		0	0.02069	3.52235	3	2298.18	-0.31065	58.2246	0
	High	LSSPATLnSR	3	1	1	TRYP_PIG	N8(Deamidated)	0		0	0.002548	3.344	2	1046.55	1.69966	29.9542	0
	High	IITHPnFNGNTLDNDIMLIK	5	1	1	TRYP_PIG	N6(Deamidated)	0		0	0.001017	3.15595	3	2284.17	4.66847	58.2492	0
	High	LSSPATLNSR	2	1	1	TRYP_PIG		0		0	0.02917	2.41708	2	1045.56	0.423898	29.903	0
	High	APVLSDSScK	2	1	1	TRYP_PIG	C9(Carbamidomethyl)	0		0	0.004575	2.18755	2	1063.51	1.10207	25.0175	0
	High	VATVSLPR	7	1	1	TRYP_PIG		0		0.004	0.07071	2.12221	2	842.51	0.550728	42.0101	0
K2C1_HUMAN	COMMON CONTAMINANT!	29.6228	20.53	13	9	10	12	643	65.8469	8.11865
	A2	Sequence	# PSMs	# Proteins	# Protein Groups	Protein Group Accessions	Modifications	ΔCn	phosphoRS Site Probabilities	q-Value	PEP	XCorr	Charge	MH+ [Da]	ΔM [ppm]	RT [min]	# Missed Cleavages
	High	FLEQQNQVLQTK	1	5	1	K2C1_HUMAN		0		0	0.01148	3.32169	2	1475.79	0.913	38.6146	0
	High	FSScGGGGGSFGAGGGFGSR	1	2	1	K2C1_HUMAN	C4(Carbamidomethyl)	0		0	0.0009887	3.02766	2	1765.74	0.192396	40.9347	0
	High	QISNLQQSISDAEQR	1	2	1	K2C1_HUMAN		0		0	0.0001393	2.56061	2	1716.85	0.391961	44.5143	0
	High	SKAEAESLYQSK	1	2	1	K2C1_HUMAN		0		0	0.005144	2.55008	2	1340.67	0.695409	26.4984	1
	High	GSGGGSSGGSIGGR	1	2	1	K2C1_HUMAN		0		0	0.0002601	2.5055	2	1092.5	1.28948	17.1583	0
	High	LALDLEIATYR	3	14	2	P14136-3;K2C1_HUMAN		0		0	0.005324	2.42242	2	1277.71	1.70187	61.468	0
	High	TNAENEFVTIKK	1	2	1	K2C1_HUMAN		0		0	0.02177	2.07995	2	1393.73	1.13433	34.0095	1
	High	YEELQITAGR	1	3	1	K2C1_HUMAN		0		0	0.0198	2.04384	2	1179.6	1.6898	39.868	0
	High	LNDLEDALQQAK	1	2	1	K2C1_HUMAN		0		0.004	0.05379	2.18086	2	1357.7	0.627218	48.2719	0
	Medium	SLNNQFASFIDKVR	1	2	1	K2C1_HUMAN		0		0.02	0.1224	2.41021	3	1638.86	0.183853	57.5413	1
P13645	Keratin, type I cytoskeletal 10 OS=Homo sapiens GN=KRT10 PE=1 SV=6 - [K1C10_HUMAN]	27.5069	27.91	2	10	10	11	584	58.7917	5.21143
	A2	Sequence	# PSMs	# Proteins	# Protein Groups	Protein Group Accessions	Modifications	ΔCn	phosphoRS Site Probabilities	q-Value	PEP	XCorr	Charge	MH+ [Da]	ΔM [ppm]	RT [min]	# Missed Cleavages
	High	NVQALEIELQSQLALK	1	2	1	P13645		0		0	0.001621	3.10953	3	1797.01	1.20635	59.9901	0
	High	nVSTGDVNVEmNAAPGVDLTQLLNNmR	2	2	1	P13645	N1(Deamidated); M11(Oxidation); M26(Oxidation)	0		0	0.001023	3.01372	3	2905.39	6.33262	58.9782	0
	High	QSLEASLAETEGR	1	2	1	P13645		0		0	0.0009222	2.90552	2	1390.68	1.59761	42.6563	0
	High	SSSSGSVGESSSK	1	2	1	P13645		0		0	0.0005104	2.82195	2	1185.52	1.12042	13.4388	0
	High	HGnSHQGEPR	1	2	1	P13645	N3(Deamidated)	0		0	0.006276	2.77348	2	1119.49	-1.45861	12.4412	0
	High	TIDDLKNQILNLTTDNANILLQIDNAR	1	2	1	P13645		0		0	0.007812	2.68003	3	3052.63	1.96738	62.226	1
	High	GSLGGGFSSGGFSGGSFSR	1	2	1	P13645		0		0	0.02049	2.45324	2	1707.77	0.662692	49.5139	0
	High	SQYEQLAEQNRK	1	2	1	P13645		0		0.004	0.08089	3.01841	2	1493.74	1.19853	27.1826	1
	High	SLLEGEGSSGGGGR	1	2	1	P13645		0		0.004	0.03617	2.50994	2	1262.6	0.873516	30.124	0
	Medium	ALEESNYELEGK	1	2	1	P13645		0		0.02	0.1066	2.22107	2	1381.65	0.544335	36.6415	0
P35527	Keratin, type I cytoskeletal 9 OS=Homo sapiens GN=KRT9 PE=1 SV=3 - [K1C9_HUMAN]	26.8575	15.73	3	7	7	10	623	62.0268	5.23682
	A2	Sequence	# PSMs	# Proteins	# Protein Groups	Protein Group Accessions	Modifications	ΔCn	phosphoRS Site Probabilities	q-Value	PEP	XCorr	Charge	MH+ [Da]	ΔM [ppm]	RT [min]	# Missed Cleavages
	High	EIETYHNLLEGGQEDFESSGAGK	1	3	1	P35527		0		0	0.005673	3.98285	3	2510.13	0.947822	51.1583	0
	High	SGGGGGGGLGSGGSIR	2	2	1	P35527		0		0	0.0001823	3.4403	2	1232.6	0.739236	26.3727	0
	High	QGVDADINGLR	1	3	1	P35527		0		0	0.005545	2.78207	2	1157.59	1.36974	38.8196	0
	High	TLLDIDNTR	2	2	1	P35527		0		0	0.02336	2.33104	2	1060.56	0.729058	42.7224	0
	High	QGVDADInGLR	1	3	1	P35527	N8(Deamidated)	0		0	0.01799	2.06663	2	1158.58	0.0980005	36.4322	0
	High	FSSSGGGGGGGR	1	1	1	P35527		0		0.004	0.04306	2.58672	2	982.434	0.685548	15.5457	0
	High	FSSSSGYGGGSSR	1	2	1	P35527		0		0.004	0.07406	2.28517	2	1235.53	0.669603	24.4625	0
	Medium	VQALEEANNDLENK	1	2	1	P35527		0		0.03	0.1485	2.47239	2	1586.77	1.04003	37.1349	0
CAS1_BOVIN	COMMON CONTAMINANT!	17.1594	15.89	1	2	2	7	214	24.5134	5.021
	A2	Sequence	# PSMs	# Proteins	# Protein Groups	Protein Group Accessions	Modifications	ΔCn	phosphoRS Site Probabilities	q-Value	PEP	XCorr	Charge	MH+ [Da]	ΔM [ppm]	RT [min]	# Missed Cleavages
	High	EPmIGVnQELAYFYPELFR	2	1	1	CAS1_BOVIN	M3(Oxidation); N7(Deamidated)	0		0	9.019e-05	3.22191	2	2333.13	6.62327	62.0473	0
	High	HQGLPQEVLNENLLR	3	1	1	CAS1_BOVIN		0		0	0.0176	2.98558	3	1759.94	-0.791862	55.0139	0
	High	EPmIGVNQELAYFYPELFR	2	1	1	CAS1_BOVIN	M3(Oxidation)	0		0	0.000351	2.57528	3	2332.14	2.27898	62.0569	0
CASB_BOVIN	COMMON CONTAMINANT!	11.005	15.63	1	2	2	4	224	25.0913	5.35107
	A2	Sequence	# PSMs	# Proteins	# Protein Groups	Protein Group Accessions	Modifications	ΔCn	phosphoRS Site Probabilities	q-Value	PEP	XCorr	Charge	MH+ [Da]	ΔM [ppm]	RT [min]	# Missed Cleavages
	High	FQsEEQQQTEDELQDK	2	1	1	CASB_BOVIN	S3(Phospho)	0	S(3): 99.8; T(9): 0.2	0	0.00587	3.76938	3	2061.83	0.435822	40.347	0
	High	DmPIQAFLLYQEPVLGPVR	1	1	1	CASB_BOVIN	M2(Oxidation)	0		0.004	0.04892	2.7868	3	2202.16	-0.956597	61.6758	0
	Medium	DMPIQAFLLYQEPVLGPVR	1	1	1	CASB_BOVIN		0		0.02	0.1052	2.16989	2	2186.17	0.820628	62.3042	0
CAS2_BOVIN	COMMON CONTAMINANT!	4.85137	10.36	1	2	2	2	222	26.0023	8.42627
	A2	Sequence	# PSMs	# Proteins	# Protein Groups	Protein Group Accessions	Modifications	ΔCn	phosphoRS Site Probabilities	q-Value	PEP	XCorr	Charge	MH+ [Da]	ΔM [ppm]	RT [min]	# Missed Cleavages
	High	TVDmEsTEVFTK	1	1	1	CAS2_BOVIN	M4(Oxidation); S6(Phospho)	0	T(1): 0.0; S(6): 90.3; T(7): 9.7; T(11): 0.0	0.004	0.04702	2.54838	2	1482.61	1.27951	39.1327	0
	Medium	ALNEINQFYQK	1	1	1	CAS2_BOVIN		0		0.034	0.1809	2.30299	2	1367.7	0.751213	45.4602	0
Q86WD7-4	Isoform 4 of Serpin A9 OS=Homo sapiens GN=SERPINA9 - [SPA9_HUMAN]	3.4183	14.37	4	1	1	1	334	37.6409	9.96436
	A2	Sequence	# PSMs	# Proteins	# Protein Groups	Protein Group Accessions	Modifications	ΔCn	phosphoRS Site Probabilities	q-Value	PEP	XCorr	Charge	MH+ [Da]	ΔM [ppm]	RT [min]	# Missed Cleavages
	Medium	TQILqGLGFNLtHTPESAIHqGFQHLVHSLTVPSKDLTLKmGSALFVK	1	4	1	Q86WD7-4	Q5(Deamidated); T12(Phospho); Q21(Deamidated); M41(Oxidation)	0	T(1): 19.2; T(12): 10.3; T(14): 10.3; S(17): 12.2; S(29): 9.3; T(31): 9.5; S(34): 9.3; T(38): 10.3; S(43): 9.8	0.023	0.1412	3.4183	5	5337.69	-8.21385	61.9084	2
CASK_BOVIN	COMMON CONTAMINANT!	2.7236	9.47	1	1	1	1	190	21.2559	6.771
	A2	Sequence	# PSMs	# Proteins	# Protein Groups	Protein Group Accessions	Modifications	ΔCn	phosphoRS Site Probabilities	q-Value	PEP	XCorr	Charge	MH+ [Da]	ΔM [ppm]	RT [min]	# Missed Cleavages
	High	SPAQILQWQVLSNTVPAK	1	1	1	CASK_BOVIN		0		0	0.009451	2.7236	3	1980.09	1.00278	58.9391	0
K7EMS3	Keratin, type I cytoskeletal 19 (Fragment) OS=Homo sapiens GN=KRT19 PE=1 SV=1 - [K7EMS3_HUMAN]	2.50225	4.97	12	1	1	1	181	20.1741	4.60205
	A2	Sequence	# PSMs	# Proteins	# Protein Groups	Protein Group Accessions	Modifications	ΔCn	phosphoRS Site Probabilities	q-Value	PEP	XCorr	Charge	MH+ [Da]	ΔM [ppm]	RT [min]	# Missed Cleavages
	Medium	VLDELTLAR	1	12	1	K7EMS3		0		0.02	0.119	2.50225	2	1029.6	1.40173	45.8837	0
P81605	Dermcidin OS=Homo sapiens GN=DCD PE=1 SV=2 - [DCD_HUMAN]	2.3793	10	2	1	1	1	110	11.2768	6.53662
	A2	Sequence	# PSMs	# Proteins	# Protein Groups	Protein Group Accessions	Modifications	ΔCn	phosphoRS Site Probabilities	q-Value	PEP	XCorr	Charge	MH+ [Da]	ΔM [ppm]	RT [min]	# Missed Cleavages
	High	DAVEDLESVGK	1	2	1	P81605		0		0	0.006937	2.3793	2	1161.56	0.701884	46.9054	0
H0Y8D1	Trypsin-1 (Fragment) OS=Homo sapiens GN=PRSS1 PE=3 SV=1 - [H0Y8D1_HUMAN]	2.10605	7.04	3	1	1	2	142	15.4118	7.26904
	A2	Sequence	# PSMs	# Proteins	# Protein Groups	Protein Group Accessions	Modifications	ΔCn	phosphoRS Site Probabilities	q-Value	PEP	XCorr	Charge	MH+ [Da]	ΔM [ppm]	RT [min]	# Missed Cleavages
	High	TLnNDIMLIk	2	3	1	H0Y8D1	N3(Deamidated); K10(Methyl)	0		0.004	0.06504	2.10605	2	1189.65	0.375558	52.6735	0

## Sheet: Legend
Legend	Important ones are highlighted with Yellow color
In the Proteins Only Worksheet: Only proteins (no peptides) are listed to facilitate easier sorting.
In Proteins&Peptides Worksheet
Lists proteins and peptides identified in the sample. Click on "+" sign on the extreme left of each protein to view the peptides that were actually sequenced.
Some explanation is provided for the column header(s) found in both worksheets.
Accession	Accession number of the protein in UniProtKB.
Description	Protein name
Score	The protein score, which is the sum of the scores of the individual peptides. Higher the number more confident is the identification. However, this should not be taken strictly into consideration (i.e. there is not strict cut-off value)
Coverage	The percent coverage calculated by dividing the number of amino acids in all found peptides by the total number of amino acids in the entire protein sequence. (The higher the better; but single peptide hits might still be OK if MS/MS spectrum is verified)
# Proteins	The number of identified proteins in the protein group of a master protein. Generally, the other proteins (whose accession number can be found in "protein group accession") are isoforms or just multiple entries for the same protein.
# Unique peptides	The number of peptide sequences unique to master protein (listed main accession number)
# Peptides	The number of distinct peptide sequences that can be assigned to the protein group. Higher the better, however, single peptide identifications are acceptable if MS/MS spectra can be manually veriied and/or provided.
# PSMs	The total number of identified peptide sequences (peptide spectrum matches) for the protein, including those redundantly identified. (The higher the better). This can also be used as a rough indicator of abundance of the protein (label-free spectral counting)
# AAs, MW [kDa], calc. pI	The calculated parameters of the protein based on the amino acid sequence in the database used to generate the report.
In the Peptide view (i.e., after clicking on + sign)
The first column (usually with A3, B3 etc name): Shows "high" or "medium". Depending on how the data was filtered, these denote 1% FDR (High) and 5% FDR (medium).
Sequence: Sequence of the peptide sequenced.
# PSMs	#of peptide-to-spectral matches for the particular sequence.
# Proteins	Displays the number of proteins in which this peptide is found
# Protein Groups	Due to sequence redundancy (multiple entries for the same sequence) in the database selected, or protein isoforms or just proteins with few shared peptides, the software may not be able to assign a particular peptide to just one protein. It will report one accession number which can account for all or most of the peptides and other proteins in the database which account for a fraction of the iden…
Protein Group Accessions
Modifications	Static and dynamic modifications are listed. The modified amino acids are listed (such as M or C or S) with a number next two them. That number indicates the position of that amino acid in the peptide sequence (not protein sequence).
	carbamidomethyl : modification on Cysteine (processing artifact)
	Oxidation: Oxidation of Methionine (artifact)
	Phospho: Potentially phosphorylated
	GlyGly: Potentially ubiquitinated.
	etc
delta Cn; q-value, PEP, Xcorr etc	All these are scoring indicating the quality of PSM. Lower the number the better the match is for all, except Xcorr.
Charge	Charge state of the peptide (always higher than 1)
MH+ [Da]	Observed monoisotopic mass of the peptide
delta M [ppm]	Difference between the observed and calculated mass in parts per million (lower the better)
